# Supplementary material for: Cellular Scale Anisotropic Topography Guides Schwann Cell Motility
Source: PubMed Central journal article supplement (PMC3176770; doi:10.1371/journal.pone.0024316), 2011-09-20
Supplement: pone.0024316.s001.pdf [file pone.0024316.s001.pdf]

**Table S1. Aligned steps (%)**

| p-values | Flat | P30     | P60     | G30     | G60     |
|----------|------|---------|---------|---------|---------|
| Flat     | x    | <0.0001 | <0.0001 | <0.0001 | <0.0001 |
| P30      |      | x       | <0.0001 | 1.0000  | <0.0001 |
| P60      |      |         | x       | <0.0001 | 1.0000  |
| G30      |      |         |         | x       | <0.0001 |
| G60      |      |         |         |         | x       |
