# Supplementary material for: Cellular Scale Anisotropic Topography Guides Schwann Cell Motility
Source: PubMed Central journal article supplement (PMC3176770; doi:10.1371/journal.pone.0024316), 2011-09-20
Supplement: pone.0024316.s002.pdf [file pone.0024316.s002.pdf]

**Table S2. Comparison of steady state velocity between conditions**

| $\langle v_r \rangle$ |      |        |         |         |         |
|-----------------------|------|--------|---------|---------|---------|
| p-values              | Flat | P30    | P60     | G30     | G60     |
| Flat                  | x    | 0.0128 | <0.0001 | 0.9838  | 0.9691  |
| P30                   |      | x      | 0.4677  | 0.0074  | 0.0003  |
| P60                   |      |        | x       | <0.0001 | <0.0001 |
| G30                   |      |        |         | x       | 1.0000  |
| G60                   |      |        |         |         | x       |

  

| $\langle v_x \rangle$ |      |         |        |         |         |
|-----------------------|------|---------|--------|---------|---------|
| p-values              | Flat | P30     | P60    | G30     | G60     |
| Flat                  | x    | <0.0001 | 0.0006 | <0.0001 | <0.0001 |
| P30                   |      | x       | 0.0129 | 0.0096  | 0.2043  |
| P60                   |      |         | x      | <0.0001 | <0.0001 |
| G30                   |      |         |        | x       | 0.5400  |
| G60                   |      |         |        |         | x       |

  

| $\langle v_y \rangle$ |      |         |         |         |         |
|-----------------------|------|---------|---------|---------|---------|
| p-values              | Flat | P30     | P60     | G30     | G60     |
| Flat                  | x    | <0.0001 | <0.0001 | <0.0001 | <0.0001 |
| P30                   |      | x       | <0.0001 | 0.9787  | <0.0001 |
| P60                   |      |         | x       | 0.0007  | 0.0001  |
| G30                   |      |         |         | x       | <0.0001 |
| G60                   |      |         |         |         | x       |
