# Supplementary material for: Cellular Scale Anisotropic Topography Guides Schwann Cell Motility
Source: PubMed Central journal article supplement (PMC3176770; doi:10.1371/journal.pone.0024316), 2011-09-20
Supplement: pone.0024316.s003.pdf [file pone.0024316.s003.pdf]

**Table S3. Characteristic times,  $\tau_{c,i}$ , and comparisons with SC on flat**

|      | $\tau_{c,x}$ (min) | p-value |
|------|--------------------|---------|
| Flat | 16.84±13.62        | -       |
| P30  | 39.19±41.87        | <0.001  |
| P60  | 22.85±26.68        | 0.0326  |
| G30  | 26.10±24.64        | 0.0035  |
| G60  | 19.71±15.38        | 0.1275  |

  

|      | $\tau_{c,y}$ (min) | p-value |
|------|--------------------|---------|
| Flat | 16.84±13.62        | -       |
| P30  | 6.0±2.0            | <0.001  |
| P60  | 6.1±2.4            | <0.001  |
| G30  | 5.1±0.8            | <0.001  |
| G60  | 5.6±1.8            | <0.001  |
