# Supplementary material for: Cellular Scale Anisotropic Topography Guides Schwann Cell Motility
Source: PubMed Central journal article supplement (PMC3176770; doi:10.1371/journal.pone.0024316), 2011-09-20
Supplement: pone.0024316.s004.pdf [file pone.0024316.s004.pdf]

**Table S4. Turning probabilities, and comparisons with SC on flat**

|      | <i>x</i> probability | p-value |
|------|----------------------|---------|
| Flat | 0.28±0.084           | -       |
| P30  | 0.18±0.076           | <0.001  |
| P60  | 0.23±0.066           | <0.001  |
| G30  | 0.22±0.099           | <0.001  |
| G60  | 0.25±0.068           | 0.0190  |

  

|      | <i>y</i> probability | p-value |
|------|----------------------|---------|
| Flat | 0.28±0.084           | -       |
| P30  | 0.41±0.048           | <0.001  |
| P60  | 0.32±0.066           | <0.010  |
| G30  | 0.46±0.065           | <0.001  |
| G60  | 0.36±0.074           | <0.001  |
