# Supplementary material for: Cellular Scale Anisotropic Topography Guides Schwann Cell Motility
Source: PubMed Central journal article supplement (PMC3176770; doi:10.1371/journal.pone.0024316), 2011-09-20
Supplement: pone.0024316.s006.pdf [file pone.0024316.s006.pdf]

**Table S6. Aligned steps (%)**

|     | p-values | None | Soma    | Ext.    |
|-----|----------|------|---------|---------|
| P60 | None     | x    | <0.0001 | 0.2760  |
|     | Soma     |      | x       | <0.0001 |
|     | Ext.     |      |         | x       |
| G60 | None     | x    | 0.0001  | <0.0001 |
|     | Soma     |      | x       | <0.0001 |
|     | Ext.     |      |         | x       |
