# Supplementary material for: Cellular Scale Anisotropic Topography Guides Schwann Cell Motility
Source: PubMed Central journal article supplement (PMC3176770; doi:10.1371/journal.pone.0024316), 2011-09-20
Supplement: pone.0024316.s007.pdf [file pone.0024316.s007.pdf]

**Table S7. Number of extensions**

| p-values | Flat | P30    | P60    | G30    | G60    |
|----------|------|--------|--------|--------|--------|
| Flat     | x    | 0.0453 | 0.9999 | 0.0569 | 0.9999 |
| P30      |      | x      | 0.0032 | 1.0000 | 0.0065 |
| P60      |      |        | x      | 0.0027 | 1.0000 |
| G30      |      |        |        | x      | 0.0057 |
| G60      |      |        |        |        | x      |
